# Comprehensive pathway analyses of schizophrenia risk loci point to dysfunctional postsynaptic signaling

Dick Schijven<sup>1,2,3,†</sup>, Daniel Kofink<sup>4</sup>, Vinicius Tragante<sup>4</sup>, Marloes Verkerke<sup>3</sup>, Sara L. Pulit<sup>2</sup>,  
René S. Kahn<sup>1,5</sup>, Jan H. Veldink<sup>2</sup>, Christiaan H. Vinkers<sup>1</sup>, Marco P. Boks<sup>1</sup>, Jurjen J. Luykx

<sup>1,3,6</sup>

1. Department of Psychiatry, Brain Center Rudolf Magnus, University Medical Center Utrecht, the Netherlands
2. Department of Neurology and Neurosurgery, Brain Center Rudolf Magnus, University Medical Center Utrecht, the Netherlands
3. Department of Translational Neuroscience, Brain Center Rudolf Magnus, University Medical Center Utrecht, the Netherlands
4. Department of Cardiology, Division Heart and Lungs, University Medical Center Utrecht, the Netherlands
5. Department of Psychiatry, Icahn School of Medicine at Mount Sinai, New York, NY, USA
6. Department of Psychiatry, ZNA hospitals, Antwerp, Belgium

<sup>†</sup> Corresponding author:

Dick Schijven, Brain Center Rudolf Magnus, University Medical Center Utrecht, Universiteitsweg 100,

3584CG Utrecht, the Netherlands

Email: D.Schijven@umcutrecht.nl

# **Abstract**

Large-scale genome-wide association studies (GWAS) have implicated many low-penetrance loci in schizophrenia, but have yielded limited insight into disease pathophysiology. This limited understanding of the etiology of schizophrenia hampers the development of novel pharmacological treatments. Pathway and gene set analyses may provide biological context to genome-wide data and carry the potential to generate hypotheses about disease mechanisms and leads for novel drug discovery. We aimed to examine which neurobiological processes are likely candidates to underlie schizophrenia by integrating genetic data with existing pathway analysis tools in a comprehensive bioinformatics pipeline. Using unbiased pathway analysis methods to weigh the role of biological processes in schizophrenia, we demonstrate enrichment of schizophrenia-associated single-nucleotide polymorphisms (SNPs) in pathways and gene sets associated with synaptic functioning. We subsequently performed targeted analyses of neurotransmitter gene sets, through which we detected enrichment of gene sets representing the dopaminergic synapse, cholinergic synapse and long-term potentiation. We furthermore highlight that enrichment is mostly located in postsynaptic membrane and postsynaptic signaling components. We thus provide the strongest genetics-informed evidence to date that dysfunctional postsynaptic pathways are implicated in schizophrenia. Future studies in both preclinical and clinical settings may further disentangle these systems to allow the development of new treatment options to target core symptoms in schizophrenia.

## Introduction

Antipsychotics target synaptic signaling by changing neurotransmission of the dopamine D2 receptor (DRD2) and the serotonin 5-HT<sub>2</sub> receptor.<sup>1,2</sup> Antipsychotics are the mainstay treatment modality in schizophrenia and are fairly effective at reducing positive symptoms.<sup>3</sup> However, improving the cognitive and negative symptoms, which substantially affect quality of life, has proven challenging.<sup>4-7</sup> Although post-mortem studies, imaging and human genetic studies have contributed to theories about pathophysiological mechanisms in schizophrenia, the underlying molecular processes have not been fully elucidated.

Genetic studies provide a valuable resource to investigate the mechanisms that are likely at play in schizophrenia. Schizophrenia is highly heritable ( $h^2 \sim 80\%$ ) and polygenic, with one of the major hallmarks in the field thus far being the identification of 108 independent schizophrenia-associated risk loci.<sup>8,9</sup> Pathway and gene set enrichment analysis methods are widely used to provide more biological context to the results of such genetic association studies by testing whether biologically relevant pathways or sets of genes are enriched for genetic variants associated with a phenotype.<sup>10-12</sup> Pathway analyses using results from the latest schizophrenia genome-wide association study (GWAS) have shown enrichment of schizophrenia-associated variants in neuronal, immune and histone pathways, and the involvement of calcium signaling processes.<sup>13,14</sup> Nevertheless, several conventional pathway analysis tools have been left unused in these studies, despite their proven success for other diseases and input from comprehensively annotated databases.<sup>15-17</sup>

Aiming to comprehensively investigate the possible biological processes underlying schizophrenia, we set out to apply gene set and pathway enrichment analysis methods to the largest GWAS in schizophrenia (Figure 1).<sup>8</sup> Our results elucidate the involvement of synaptic dysfunction in schizophrenia, and enable a more nuanced understanding of the several actionable classes of neurotransmitters implicated in the disease.

## Methods

### Input data and analysis overview

We downloaded summary statistics from the largest and most recent GWAS in schizophrenia<sup>8</sup> from the website of the Psychiatric Genomics Consortium (<https://www.med.unc.edu/pgc/results-and-downloads>; downloaded on 26 March, 2015). The summary statistics contained results from approximately 9.4 million single nucleotide polymorphisms (SNPs). As detailed below (also see Figure 1), we successively mapped SNPs to genes, applied Gene Ontology (GO) term enrichment analysis and Ingenuity Pathway Analysis (IPA) as exploratory pathway analysis methods, followed by targeted analyses using Meta-Analysis Gene-set Enrichment of variant Associations (MAGENTA) and Multi-marker Analysis of GenoMic Annotation (MAGMA).

### Mapping SNPs to genes and assigning p-values to genes

Schizophrenia summary statistics were clumped using the PLINK<sup>18</sup> clump function (version 1.90b3z), thereby clustering SNPs in linkage disequilibrium (LD) with one another in blocks around top-associated SNPs. We used 1000 Genomes Phase 1 as a reference for calculating LD.<sup>19</sup> In a first round of clumping, we used a genomic window size of 250 kilobase (kb) and removed SNPs with an LD  $r^2 > 0.5$ . This was followed by a second round of clumping with a window size of 5 megabase (Mb) and an LD cutoff of  $r^2 > 0.2$ . We removed regions with a complex LD structure, including the major histocompatibility complex on chromosome 6 (Supplementary Table 1). Using MAGMA version 1.05b,<sup>20</sup> we annotated SNPs to corresponding genes, extending gene footprints by an additional 20 kb up- and downstream as a large proportion of regulatory elements involved in gene expression is likely to be captured by including this region.<sup>21</sup> We then applied a gene-based test in MAGMA to obtain a p-value for each gene to which at least one SNP was mapped. The p-value of a gene

(containing at least one SNP) was based on the mean of  $\chi^2$  statistics of SNPs contained in that gene and a known approximation of the sampling distribution.<sup>20</sup> Again, 1000 Genomes Phase I was used as a reference set for LD. We extracted 1,705 unique genes with an association p-value to schizophrenia  $\leq 5 \times 10^{-5}$  for use in GO term enrichment analysis and IPA, thus aiming to also include genes containing sub-threshold SNPs that still explain part of the variance in schizophrenia and may in the future reach genome-wide significance in larger sample size studies.

## **Exploratory gene set enrichment analyses**

### *Gene Ontology (GO) term enrichment analysis*

We used the packages *mygene*<sup>22</sup> and *Gostats*<sup>23</sup> and the Bioconductor databases *Go.db* and *org.Hs.eg.db* within R version 3.3.2 ([www.r-project.org](http://www.r-project.org)) to perform GO term enrichment analysis on the list of genes with p-values  $\leq 5 \times 10^{-5}$  (threshold explained in the previous section). Genes were annotated with ontological terms describing biological processes.

Overrepresentation of GO terms in the gene list was tested with a conditional hypergeometric test, excluding GO terms with less than 5 and more than 1000 annotations. The conditional test was applied to correct for the hierarchical structure of the Gene Ontology database, so that information on significance of ‘child terms’ was taken into account when assessing significance of ‘parent terms’ (where ‘child terms’ are the more specialized terms that are hierarchically connected to broader ‘parent terms’). Bonferroni-correction for the number of GO terms tested was applied to the significance threshold for enrichment ( $n = 471$ ,  $\alpha = 0.05/471 = 1.06 \times 10^{-4}$ ).

### *Ingenuity Pathway Analysis (IPA)*

We analyzed the same extracted 1,705 genes with an association p-value  $\leq 5 \times 10^{-5}$  as mentioned above for enrichment in all canonical pathways available in QIAGEN's Ingenuity® Pathway Analysis software (IPA®, QIAGEN Redwood City, CA, USA, [www.qiagen.com/ingenuity](http://www.qiagen.com/ingenuity)). Enrichment p-values were calculated using a right-tailed Fisher's exact test. The threshold for significant enrichment was again Bonferroni corrected for the total number of pathways tested ( $n = 310$ ,  $\alpha = 0.05/310 = 1.61 \times 10^{-4}$ ).

## Targeted pathway analyses

### *Meta-Analysis Gene-set Enrichment of varianT Associations (MAGENTA)*

MAGENTA is a summary statistics-based gene set enrichment analysis tool that assesses enrichment of pre-defined gene sets for common variants with modest association to a trait.<sup>24</sup> MAGENTA maps SNPs onto genes that are present in the gene set, assigns a score to each gene based on the lowest SNP p-value for that gene while correcting for confounding factors (e.g., gene size). It then assesses whether a gene set is enriched with low gene p-values at the 95<sup>th</sup> percentile cut-off (based on all gene p-values in the genome) compared to equally sized gene sets randomly sampled from the entire genome. Following evaluation of the results of our exploratory gene set enrichment analyses, we used seven gene sets representing synaptic signaling from the Kyoto Encyclopedia of Genes and Genomes (KEGG, [www.kegg.jp](http://www.kegg.jp), downloaded on 3 January, 2017),<sup>25</sup> as input for MAGENTA: hsa04724, Glutamatergic synapse (114 genes); hsa04725 Cholinergic synapse (111 genes); hsa04726 Serotonergic synapse (113 genes); hsa04727, GABAergic synapse (88 genes); hsa04728, Dopaminergic synapse (130 genes); hsa04720, Long-term potentiation (67 genes); hsa04730, Long-term depression (60 genes). We again extended genes with 20 kb up- and downstream regions to capture regulatory elements. The major histocompatibility complex region on chromosome 6 was also excluded by MAGENTA. In the event we found a significant enrichment of a gene

set (Bonferroni-corrected  $\alpha = 0.05/7 = 7.14 \times 10^{-3}$  for  $n = 7$  gene sets tested), we visualized enrichment in pathway components using the R package *pathview*.<sup>26</sup>

### *MAGMA gene set analysis*

Using the results from the gene-based test performed to obtain a gene list for input in GO term analysis and IPA, we applied a gene set test on the seven synaptic signaling gene sets derived from KEGG using MAGMA. We first applied a basic competitive gene set analysis to test whether genes in our gene sets exhibit a stronger association with schizophrenia than other genes. Gene length, gene density (the relative amount of LD in a gene) and inverse minor allele count were used as covariates in this analysis. Second, because many genes overlapped between two or more of the tested gene sets we applied a competitive gene set analysis where we conditioned the enrichment signal of each of the gene sets on that of the other gene sets to correct for the influence of shared genes on the enrichment signal. In line with all other statistical analyses outlined above, the threshold for significant enrichment was again Bonferroni corrected ( $\alpha = 0.05/7 = 7.14 \times 10^{-3}$  for  $n = 7$  gene sets tested).

## Results

### Exploratory GO term enrichment analysis and IPA

We first applied a hypothesis-generating approach to investigate top-enriched pathways for schizophrenia-associated SNPs. Using GO term enrichment analysis, we identified 76 overrepresented GO-terms, with the top overrepresented term being ‘synaptic signaling’ ( $p = 9.57 \times 10^{-22}$ , Figure 2, Supplementary Table 2). To corroborate the strength of the evidence, we used IPA and identified 13 significantly enriched pathways (after Bonferroni correction), with the strongest evidence again pointing to enrichment of synaptic processes (Figure 2, Supplementary Table 3).

### Targeted follow-up analyses of synaptic signaling

To gain a more nuanced understanding of the synaptic molecules enriched for schizophrenia-associated variants, we tested enrichment of schizophrenia GWAS SNPs in specific gene sets representing synaptic signaling which we derived from KEGG. A significant enrichment was found for gene sets representing the dopaminergic synapse (18 genes with p-values above the 95<sup>th</sup> percentile cutoff, where 6 were expected,  $p = 5.3 \times 10^{-5}$ ), synaptic long-term potentiation through glutamate (10 genes with p-values above the 95<sup>th</sup> percentile cutoff, where 3 were expected,  $p = 1.9 \times 10^{-3}$ ) and the cholinergic synapse (13 genes with p-values above the 95<sup>th</sup> percentile cutoff, where 6 were expected,  $p = 3.2 \times 10^{-3}$ ; Figure 3, Supplementary Table 4). We mapped SNP enrichment in MAGENTA on components within these KEGG pathways. SNP enrichment was restricted to trans-membrane and postsynaptic components in the cholinergic and dopaminergic synapses. The long-term potentiation pathway only included elements in these cellular domains. High enrichment was found in signaling through extracellular signal-regulated kinase (ERK) and cAMP response element-binding protein (CREB), phospholipase C (PLC) and the inositol trisphosphate receptor (IP<sub>3</sub>R), and signaling



through protein kinase B (PKB/Akt). These cascades converge on mechanisms involved in synaptic growth regulation and synaptic plasticity. Furthermore, voltage-gated calcium channels, glutamatergic NMDA and AMPA receptors and the dopamine D2 receptor (DRD2) were highly enriched (Figure 4).

### **Replication analyses using MAGMA**

Using a competitive gene set analysis in MAGMA, we replicated the enrichment of the dopaminergic synapse that we found with MAGENTA ( $p = 5.41 \times 10^{-4}$ ; Figure 3, Supplementary Table 5). We did not replicate enrichment of schizophrenia-associated variants in long-term potentiation ( $p = 9.75 \times 10^{-3}$ ) or the cholinergic synapse ( $p = 1.21 \times 10^{-2}$ ) after correction for multiple gene sets tested, although these were still the most highly enriched gene sets after the dopaminergic synapse. When conditioning the enrichment signal of each of the gene sets on that of the other gene sets, the enrichment p-value of the dopaminergic synapse gene set remained Bonferroni-corrected significant ( $p = 6.95 \times 10^{-3}$ ; Figure 3, Supplementary Table 5). Enrichment p-values for the other gene sets remained non-significant. Finally, all genes that showed significant enrichment at the 95<sup>th</sup> percentile cutoff in MAGENTA turned out to have gene p-values  $< 0.05$  through our SNP-to-gene mapping analysis in MAGMA (data not shown), further pleading for the implication of the highlighted synaptic pathways in schizophrenia.

## Discussion

By implementing existing pathway and gene set enrichment analysis tools into a comprehensive bioinformatics pipeline, we aimed to detect biological processes underlying schizophrenia. Starting with an exploratory approach, we confirmed enrichment of schizophrenia-associated SNPs in synaptic processes. We followed this up in a targeted analysis on gene sets representing synaptic systems for each major neurotransmitter, showing enrichment of schizophrenia SNPs particularly in the dopaminergic system and postsynaptic signaling cascades.

Dysfunctional synaptic transmission impacts synaptic plasticity and brain development, mediated through long-term potentiation (LTP) and long-term depression (LTD).<sup>27</sup> Although all five major neurotransmitter systems (dopamine, gamma-aminobutyric acid, glutamate, serotonin, and acetylcholine) have been implicated in disease mechanisms underlying schizophrenia, the extent to which each of them is involved had remained elusive.<sup>6, 28</sup> We here studied SNP enrichment in this processes, using gene sets of major neurotransmitter systems from the KEGG database, in which we also visualized this enrichment. Our results strongly support the involvement of the dopaminergic system, which has been extensively examined in schizophrenia. Previous studies have reported increased dopamine synthesis and release, and increased dopamine receptor expression in schizophrenia.<sup>6, 29</sup> *DRD2* genetic variants are also implicated in schizophrenia and several of its intermediate phenotypes.<sup>30, 31</sup> We here confirm an accumulation of genetic variants in this receptor in schizophrenia. Moreover, we extend this evidence for involvement of the dopaminergic system by highlighting enrichment of variants in signaling cascades downstream of this receptor.

Our detailed analysis of downstream signaling cascades in all major neurotransmitter system gene sets revealed several of these cascades to be highly enriched for schizophrenia-

associated variants: the phospholipase pathway, CREB signaling and the protein kinase B signaling cascade. All of these cascades may be linked to schizophrenia by numerous lines of neurobiological evidence, as outlined below. First, the phospholipase pathway (particularly PLC) controls neuronal activity and thereby maintains synaptic functioning and development. Activation of PLC $\beta$  and PLC $\gamma$  results in cleavage of phosphatidylinositol 4,5-bisphosphate (PIP<sub>2</sub>) into the active form inositol 1,4,5-trisphosphate (IP<sub>3</sub>),<sup>32</sup> in whose receptor (IP<sub>3</sub>R) we report enrichment of schizophrenia-associated SNPs. Gene deletions in PLC are reported to be associated with schizophrenia and altered expression of PLC and schizophrenia-like behavior has been reported in PLC knock-out mice.<sup>33-35</sup> Second, signaling through the cellular transcription factor CREB modulates synaptic plasticity. A recent study focusing on the cyclic adenosine monophosphate (cAMP)/PKA/CREB pathway shows a significant association of a SNP in this system with schizophrenia.<sup>36</sup> Additionally, ERK is part of the CREB signaling cascade and was also found to be enriched in our analyses. Impairment of signaling through ERK is hypothesized as a disease mechanism in schizophrenia.<sup>37, 38</sup> Third, we found a significant enrichment of schizophrenia SNPs in postsynaptic protein kinase B (PKB or Akt). *AKT1* messenger RNA levels are higher in blood of schizophrenia patients compared to healthy controls and interactions between genetic variation in *AKT1* and cannabis use are associated with schizophrenia, possibly mediated through AKT signaling downstream of DRD2.<sup>39, 40</sup> Interestingly, phosphorylation of glycogen synthase kinase 3 beta (Gsk3 $\beta$ ) by the antipsychotic aripiprazole is mediated by Akt.<sup>41</sup> Finally, we detected an accumulation of SNPs in protein phosphatase 1 (PP1) and protein phosphatase 2A (PP2A). PP2A is one of the mediators of sensorimotor gating, an intermediate phenotype for schizophrenia.<sup>42</sup>

Enrichment of schizophrenia-associated SNPs in the cholinergic synapse primarily came from our MAGENTA analysis. Cholinergic transmission may be relevant to

symptomatology of schizophrenia, especially in light of its high rates of nicotine abuse and cognitive impairment.<sup>43-45</sup> The implication of acetylcholine in schizophrenia is further supported by a landmark study investigating chromatin interactions between enhancer regions containing schizophrenia-associated loci and promoter regions of target genes.<sup>46</sup> Enrichment of the glutamate-induced LTP pathway was another finding that could only be verified using MAGENTA. Mediation of LTP is however not limited to the glutamatergic system, as post-synaptic signaling molecules such as the above mentioned CREB, IP<sub>3</sub>R and PKB mediate synaptic plasticity in other neurotransmitter systems (e.g. the dopaminergic system). Multiple lines of evidence link LTP to cognitive deficits in schizophrenia.<sup>47</sup> The lack of cross-validation of the cholinergic and LTP pathways with other techniques than MAGENTA is likely due to technical differences between these programs.<sup>20, 24</sup> Nevertheless, individual genes that were significantly enriched in MAGENTA were all found to be enriched in MAGMA, leading us to hypothesize that reduced power may be at the root of such lack of replication.

Several limitations should be considered when interpreting our results. First, no significant SNP enrichment was found in other systems hypothesized to be dysregulated in schizophrenia, e.g. glutamatergic and GABAergic neurotransmission.<sup>6, 48, 49</sup> As our analyses are dependent on the power of GWAS, we cannot rule out the possibility that increased sample sizes in future studies may flag such systems. Second, we can only test for enrichment in gene sets and pathways that are annotated based on the knowledge currently available. Third, only protein-coding regions of the genome and up- and downstream regions in close proximity to genes were considered in our analyses. Recently, it has become clear that non-coding stretches of the genome account for a major part of disease heritability and transcription regulation.<sup>46, 50</sup> As the current analyses do not allow us to probe non-coding regions, we cannot take into account the effects that such genomic areas may have on

neurotransmitter systems. Future integration of expression quantitative trait locus (eQTL) data and genomic interactions in pathway analysis tools has the potential to further deepen our understanding of the molecular mechanisms underlying schizophrenia.

In conclusion, using our comprehensive pathway analysis pipeline we highlight downstream signaling cascades as the most likely part of the dopamine system to have a role in schizophrenia. Conditional analysis correcting mainly for post-synaptic signaling genes showed a decreased enrichment of all neurotransmitter gene sets, supporting the hypothesis that postsynaptic signaling in general may be a stronger underlying mechanism in schizophrenia than these neurotransmitter systems independently. Our results open avenues for follow-up research aimed at elucidating signaling pathways in schizophrenia. They also provide leads for novel drug development targeting downstream cascades to hopefully reduce the burden imposed on quality of life in patients suffering from this disabling disorder.

## **Acknowledgments**

We thank Dr. Sander van der Laan for his assistance with using Ingenuity Pathway Analysis software.

## Figures

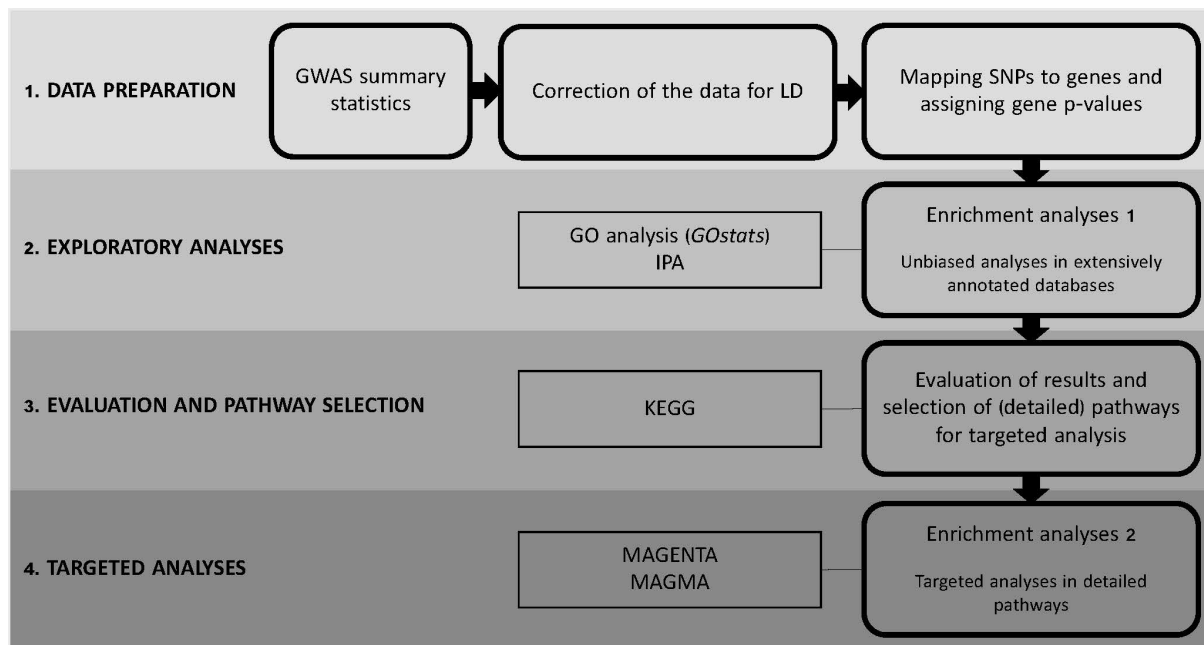

**Figure 1 Overview of our pathway analysis pipeline.** The analysis pipeline consists of four stages. In the first stage, linkage disequilibrium (LD) is removed from the data and SNPs are mapped to genes. Second, exploratory enrichment analyses are performed in gene sets included in the densely-annotated databases of Ingenuity Pathway Analysis (IPA) and Gene Ontology (GO). Third, results of the exploratory analyses are evaluated and pathways representing enriched biological processes are selected from the Kyoto Encyclopedia of Genes and Genomes (KEGG) database, which contains detailed molecular pathways. In the final stage, we perform targeted enrichment analyses on the selected pathways using Meta-Analysis Gene-set Enrichment of variaNT Associations (MAGENTA) and Multi-marker Analysis of GenoMic Annotation (MAGMA).

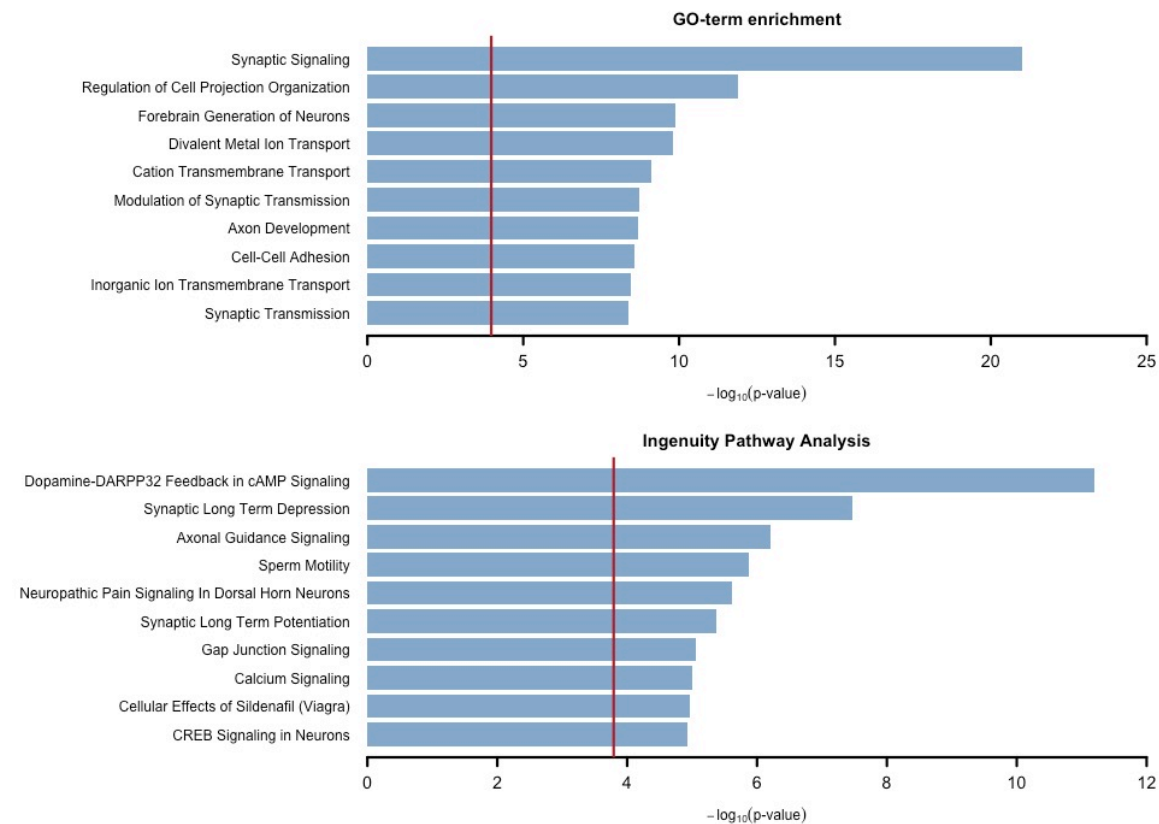

**Figure 2 Results of exploratory gene set enrichment analyses.** Top-10 enriched gene sets and pathways from GO term enrichment and IPA are shown.  $-\log_{10}$  converted enrichment p-values are represented with blue bars. Red lines indicate the Bonferroni-corrected significance threshold for GO-term enrichment analysis ( $\alpha = 1.06 \times 10^{-4}$ , red line) and IPA ( $\alpha = 1.61 \times 10^{-4}$ ).

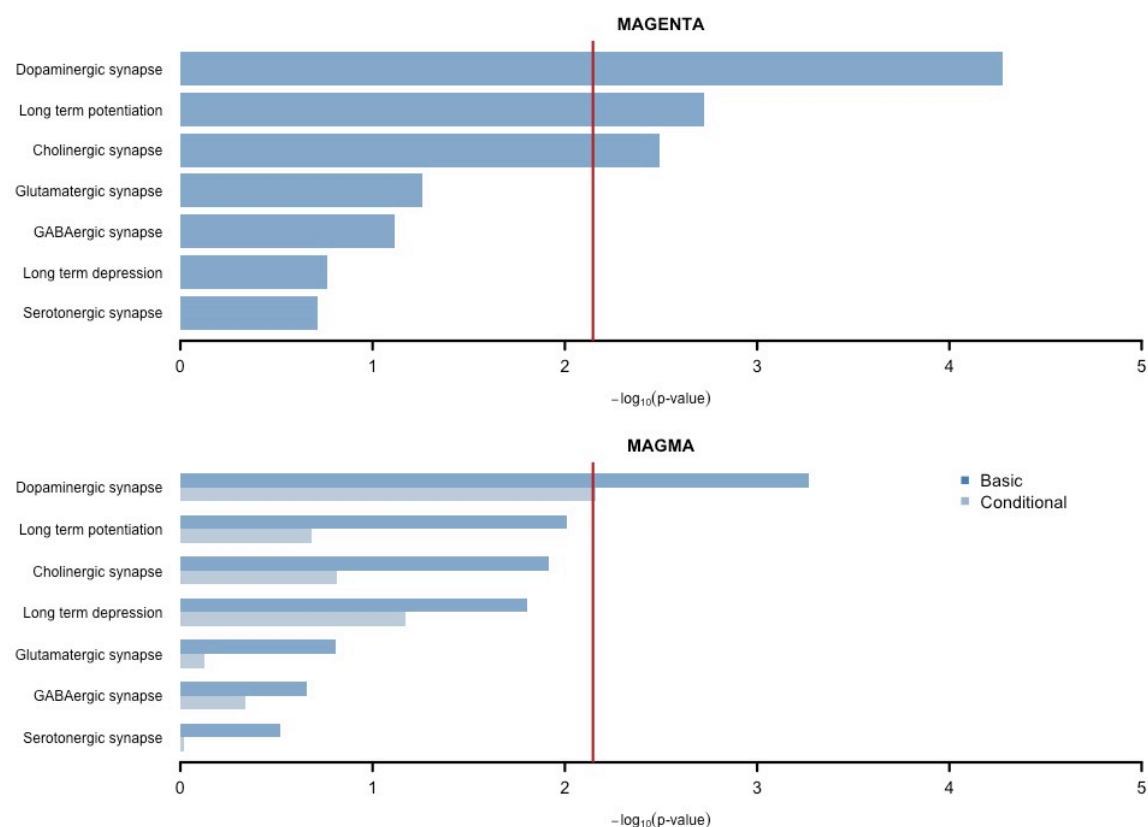

**Figure 3 Results of targeted pathway enrichment analyses in KEGG nervous system gene sets.** Results from MAGENTA and MAGMA for seven tested synaptic signaling gene sets are shown. Bars show  $-\log_{10}$  converted enrichment p-values. For MAGMA analyses, the results from both the basic (blue) and conditional (grey) competitive gene set analyses are shown. The vertical red lines indicate the Bonferroni-corrected significance threshold ( $\alpha = 7.14 \times 10^{-3}$ ).



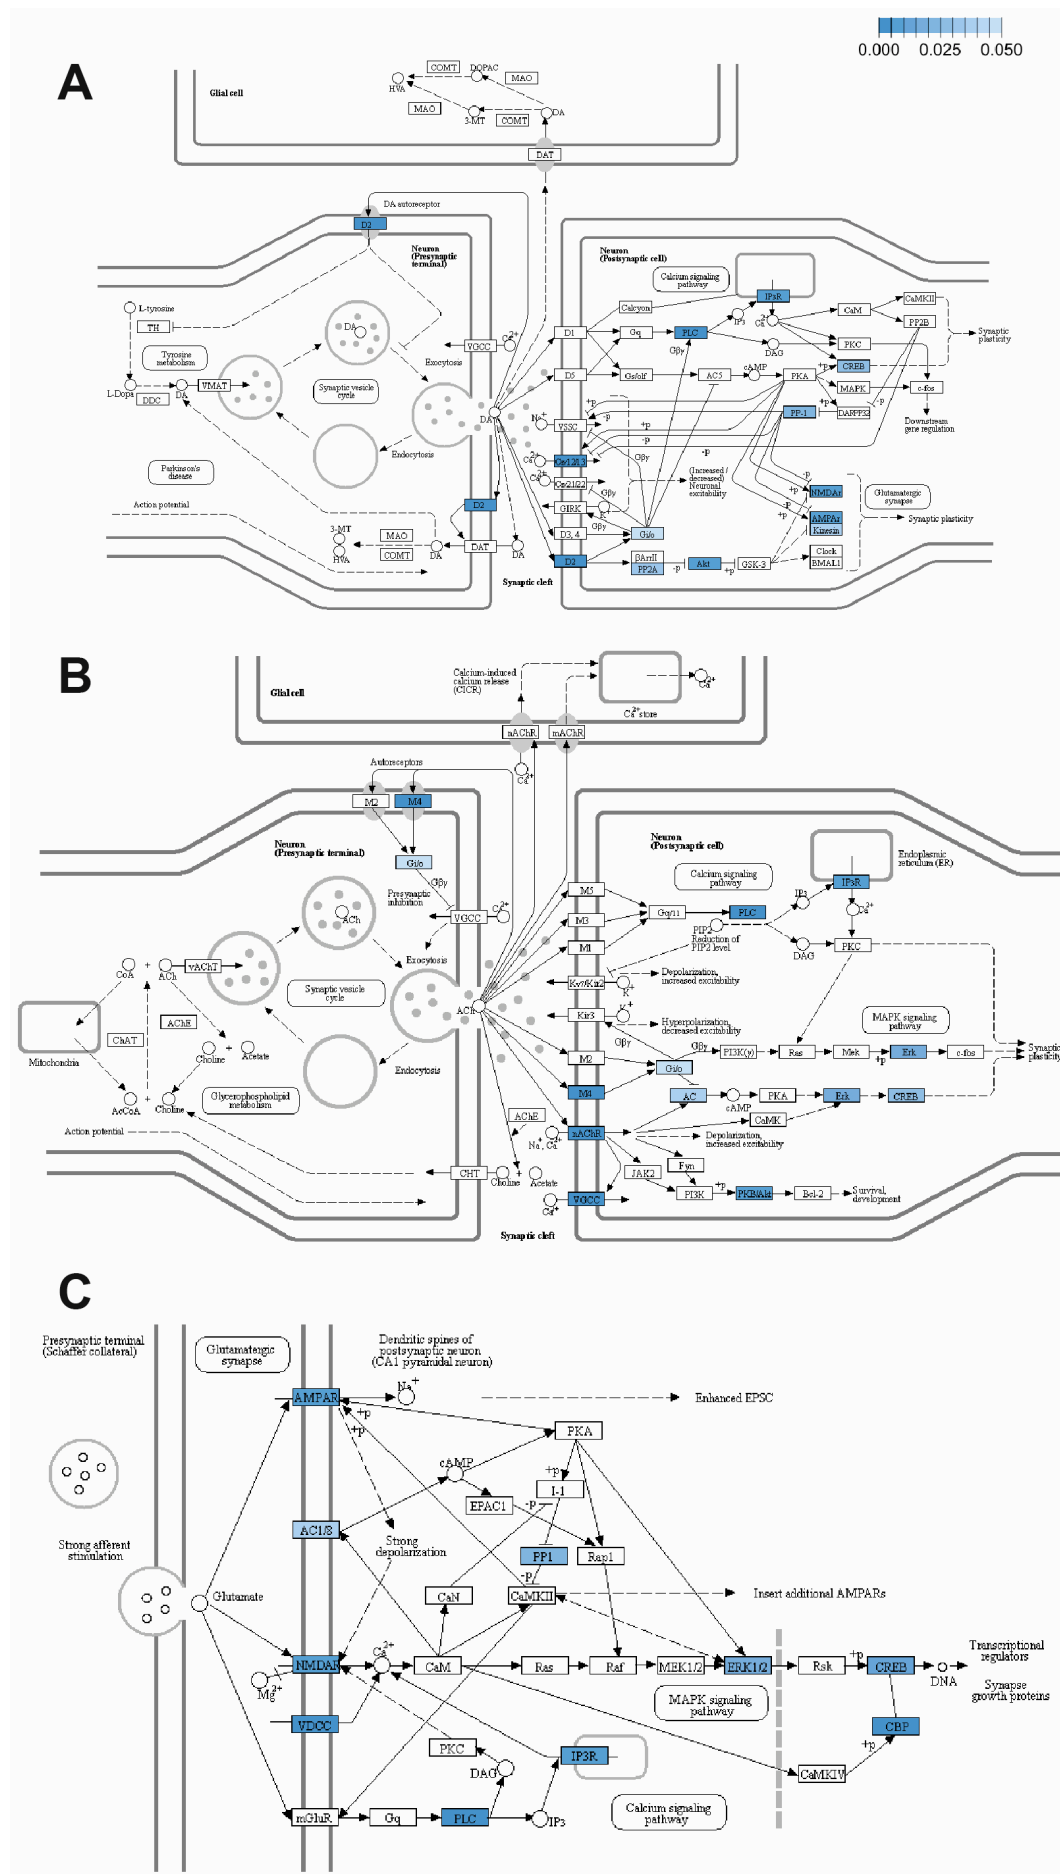

**Figure 4 Localization of SNP enrichment in molecular components of synaptic signaling in A) Dopaminergic synapse, B) Cholinergic synapse and C) Long-term potentiation**

Enrichment p-values  $< 0.05$  for components are marked with blue shading, with darker blue for lower enrichment p-values. Components with enrichment p-values  $> 0.05$  are not marked.

Data represented on graphs derived from KEGG<sup>25</sup> using the *pathview*<sup>26</sup> package in R.

# References

1. Celada P, Bortolozzi A, Artigas F. Serotonin 5-HT1A receptors as targets for agents to treat psychiatric disorders: rationale and current status of research. *CNS drugs* 2013;27:703-716.
2. Owen MJ, Sawa A, Mortensen PB. Schizophrenia. *Lancet (London, England)* Jan 14 2016.
3. Kane JM, Correll CU. Past and present progress in the pharmacologic treatment of schizophrenia. *The Journal of clinical psychiatry* Sep 2010;71(9):1115-1124.
4. Karow A, Wittmann L, Schottle D, Schafer I, Lambert M. The assessment of quality of life in clinical practice in patients with schizophrenia. *Dialogues in clinical neuroscience* Jun 2014;16(2):185-195.
5. Andreasen NC, Carpenter WT, Jr., Kane JM, Lasser RA, Marder SR, Weinberger DR. Remission in schizophrenia: proposed criteria and rationale for consensus. *The American journal of psychiatry* Mar 2005;162(3):441-449.
6. Kahn RS, Sommer IE, Murray RM, et al. Schizophrenia. *Nature Reviews Disease Primers* 11/12/online 2015:15067.
7. Koster LS, Carbon M, Correll CU. Emerging drugs for schizophrenia: an update. *Expert opinion on emerging drugs* Dec 2014;19(4):511-531.
8. Schizophrenia Working Group of the Psychiatric Genomics Consortium. Biological insights from 108 schizophrenia-associated genetic loci. *Nature* 07/24/print 2014;511(7510):421-427.
9. Lichtenstein P, Yip BH, Bjork C, Pawitan Y, Cannon TD, Sullivan PF, Hultman CM. Common genetic determinants of schizophrenia and bipolar disorder in Swedish families: a population-based study. *Lancet (London, England)* Jan 17 2009;373(9659):234-239.
10. de Leeuw CA, Neale BM, Heskes T, Posthuma D. The statistical properties of gene-set analysis. *Nat Rev Genet* Apr 12 2016.
11. Garcia-Campos MA, Espinal-Enriquez J, Hernandez-Lemus E. Pathway Analysis: State of the Art. *Frontiers in physiology* 2015;6:383.
12. Wang L, Jia P, Wolfinger RD, Chen X, Zhao Z. Gene set analysis of genome-wide association studies: Methodological issues and perspectives. *Genomics* 7// 2011;98(1):1-8.
13. Hertzberg L, Katsel P, Roussos P, Haroutunian V, Domany E. Integration of gene expression and GWAS results supports involvement of calcium signaling in Schizophrenia. *Schizophrenia research* May 2015;164(1-3):92-99.
14. The Network and Pathway Analysis Subgroup of the Psychiatric Genetics Consortium. Psychiatric genome-wide association study analyses implicate neuronal, immune and histone pathways. *Nature neuroscience* Feb 2015;18(2):199-209.

15. Shim U, Kim HN, Lee H, Oh JY, Sung YA, Kim HL. Pathway Analysis Based on a Genome-Wide Association Study of Polycystic Ovary Syndrome. *PLoS One* 2015;10(8):e0136609.
16. Naaijen J, Bralten J, Poelmans G, Glennon JC, Franke B, Buitelaar JK. Glutamatergic and GABAergic gene sets in attention-deficit/hyperactivity disorder: association to overlapping traits in ADHD and autism. *Translational psychiatry* Jan 10 2017;7(1):e999.
17. Gagliano SA, Pouget JG, Hardy J, Knight J, Barnes MR, Ryten M, Weale ME. Genomics implicates adaptive and innate immunity in Alzheimer's and Parkinson's diseases. *Annals of clinical and translational neurology* Dec 2016;3(12):924-933.
18. Chang CC, Chow CC, Tellier LC, Vattikuti S, Purcell SM, Lee JJ. Second-generation PLINK: rising to the challenge of larger and richer datasets. *Gigascience* 2015;4:7.
19. Abecasis GR, Auton A, Brooks LD, et al. An integrated map of genetic variation from 1,092 human genomes. *Nature* Nov 01 2012;491(7422):56-65.
20. de Leeuw CA, Mooij JM, Heskes T, Posthuma D. MAGMA: Generalized Gene-Set Analysis of GWAS Data. *PLoS Comput Biol* 2015;11(4):e1004219.
21. Veyrieras JB, Kudaravalli S, Kim SY, Dermitzakis ET, Gilad Y, Stephens M, Pritchard JK. High-resolution mapping of expression-QTLs yields insight into human gene regulation. *PLoS Genet* Oct 2008;4(10):e1000214.
22. Wu C, Macleod I, Su AI. BioGPS and MyGene.info: organizing online, gene-centric information. *Nucleic Acids Res* Jan 2013;41(Database issue):D561-565.
23. Falcon S, Gentleman R. Using GOstats to test gene lists for GO term association. *Bioinformatics* Jan 15 2007;23(2):257-258.
24. Segrè AV, Groop L, Mootha VK, Daly MJ, Altshuler D, DIAGRAM Consortium, MAGIC investigators. Common Inherited Variation in Mitochondrial Genes Is Not Enriched for Associations with Type 2 Diabetes or Related Glycemic Traits. *PLoS Genet* 2010;6(8):e1001058.
25. Kanehisa M, Goto S. KEGG: kyoto encyclopedia of genes and genomes. *Nucleic Acids Res* Jan 1 2000;28(1):27-30.
26. Luo W, Brouwer C. Pathview: an R/Bioconductor package for pathway-based data integration and visualization. *Bioinformatics* July 15, 2013 2013;29(14):1830-1831.
27. Bernardinelli Y, Nikonenko I, Muller D. Structural plasticity: mechanisms and contribution to developmental psychiatric disorders. *Frontiers in Neuroanatomy* 2014-November-03 2014;8(123).
28. Pocklington AJ, O'Donovan M, Owen MJ. The synapse in schizophrenia. *Eur J Neurosci* 2014;39:1059-1067.

29. Kaalund SS, Newburn EN, Ye T, et al. Contrasting changes in DRD1 and DRD2 splice variant expression in schizophrenia and affective disorders, and associations with SNPs in postmortem brain. *Mol Psychiatry* Dec 2014;19(12):1258-1266.
30. Luykx JJ, Broersen JL, de Leeuw M. The DRD2 rs1076560 polymorphism and schizophrenia-related intermediate phenotypes: A systematic review and meta-analysis. *Neuroscience & Biobehavioral Reviews* 3// 2017;74, Part A:214-224.
31. Vink M, de Leeuw M, Luykx JJ, van Eijk KR, van den Munkhof HE, van Buuren M, Kahn RS. DRD2 Schizophrenia-Risk Allele Is Associated With Impaired Striatal Functioning in Unaffected Siblings of Schizophrenia Patients. *Schizophrenia bulletin* May 2016;42(3):843-850.
32. Yang YR, Kang D-S, Lee C, Seok H, Follo MY, Cocco L, Suh P-G. Primary phospholipase C and brain disorders. *Advances in biological regulation* 5// 2016;61:80-85.
33. Lo Vasco VR, Cardinale G, Polonia P. Deletion of PLCB1 gene in schizophrenia-affected patients. *Journal of cellular and molecular medicine* Apr 2012;16(4):844-851.
34. Lin XH, Kitamura N, Hashimoto T, Shirakawa O, Maeda K. Opposite changes in phosphoinositide-specific phospholipase C immunoreactivity in the left prefrontal and superior temporal cortex of patients with chronic schizophrenia. *Biol Psychiatry* Dec 15 1999;46(12):1665-1671.
35. Koh HY. Phospholipase C-beta1 and schizophrenia-related behaviors. *Advances in biological regulation* Sep 2013;53(3):242-248.
36. Forero DA, Herteleer L, De Zutter S, Norrback KF, Nilsson LG, Adolfsson R, Callaerts P, Del-Favero J. A network of synaptic genes associated with schizophrenia and bipolar disorder. *Schizophrenia research* Apr 2016;172(1-3):68-74.
37. Kyosseva SV. The role of the extracellular signal-regulated kinase pathway in cerebellar abnormalities in schizophrenia. *Cerebellum (London, England)* 2004;3(2):94-99.
38. Yuan P, Zhou R, Wang Y, Li X, Li J, Chen G, Guitart X, Manji HK. Altered levels of extracellular signal-regulated kinase signaling proteins in postmortem frontal cortex of individuals with mood disorders and schizophrenia. *Journal of affective disorders* Jul 2010;124(1-2):164-169.
39. Liu L, Luo Y, Zhang G, Jin C, Zhou Z, Cheng Z, Yuan G. The mRNA expression of DRD2, PI3KCB, and AKT1 in the blood of acute schizophrenia patients. *Psychiatry research* 9/30/ 2016;243:397-402.
40. van Winkel R. Family-based analysis of genetic variation underlying psychosis-inducing effects of cannabis: sibling analysis and proband follow-up. *Archives of general psychiatry* Feb 2011;68(2):148-157.

41. Pan B, Chen J, Lian J, Huang X-F, Deng C. Unique Effects of Acute Aripiprazole Treatment on the Dopamine D2 Receptor Downstream cAMP-PKA and Akt-GSK3 $\beta$  Signalling Pathways in Rats. *PLoS ONE* 2015;10(7):e0132722.
42. Kapfhamer D, Berger KH, Hopf FW, Seif T, Kharazia V, Bonci A, Heberlein U. Protein Phosphatase 2a and glycogen synthase kinase 3 signaling modulate prepulse inhibition of the acoustic startle response by altering cortical M-Type potassium channel activity. *The Journal of neuroscience : the official journal of the Society for Neuroscience* Jun 30 2010;30(26):8830-8840.
43. Parikh V, Kutlu MG, Gould TJ. nAChR dysfunction as a common substrate for schizophrenia and comorbid nicotine addiction: Current trends and perspectives. *Schizophrenia research* 3// 2016;171(1–3):1-15.
44. Carruthers SP, Gurvich CT, Rossell SL. The muscarinic system, cognition and schizophrenia. *Neurosci Biobehav Rev* 2015;55:393-402.
45. Kahn RS, Keefe RS. Schizophrenia is a cognitive illness: time for a change in focus. *JAMA psychiatry* Oct 2013;70(10):1107-1112.
46. Won H, de la Torre-Ubieta L, Stein JL, et al. Chromosome conformation elucidates regulatory relationships in developing human brain. *Nature* Oct 27 2016;538(7626):523-527.
47. Salavati B, Rajji TK, Price R, Sun Y, Graff-Guerrero A, Daskalakis ZJ. Imaging-based neurochemistry in schizophrenia: a systematic review and implications for dysfunctional long-term potentiation. *Schizophrenia bulletin* 2015;41:44-56.
48. Yin DM, Chen YJ, Sathyamurthy A, Xiong WC, Mei L. Synaptic dysfunction in schizophrenia. *Advances in experimental medicine and biology* 2012;970:493-516.
49. Schmidt MJ, Mirnics K. Neurodevelopment, GABA System Dysfunction, and Schizophrenia. *Neuropsychopharmacology* 01//print 2015;40(1):190-206.
50. Corradin O, Cohen AJ, Luppino JM, Bayles IM, Schumacher FR, Scacheri PC. Modeling disease risk through analysis of physical interactions between genetic variants within chromatin regulatory circuitry. *Nat Genet* Nov 2016;48(11):1313-1320.
